# Supplementary material for: Pentacyclic triterpenoids from Ziziphus jujuba Lamk. fruits as dual inhibitors of PTP1B and α-glucosidase: in vitro and in silico evaluations
Source: Royal Society of Chemistry journal article supplement (doi:10.1039/d6ra02679f), 2026-06-02
Supplement: d6ra02679f1.pdf [file d6ra02679f1.pdf]

*Supporting information for*

## **Pentacyclic Triterpenoids from *Ziziphus jujuba* Lamk. Fruits as Dual Inhibitors of PTP1B and $\alpha$ -Glucosidase: *In Vitro* and *In Silico* Evaluation**

Linh Tran<sup>a,b,d</sup>, Thanh-Tung Phan<sup>c,d</sup>, Le Viet Ha Tran<sup>e</sup>, Minh Canh Nguyen<sup>a,d</sup>, Nguyen Tri Quang<sup>f</sup>, Phuc Tran Huu Le<sup>g</sup>, Quang-Minh Mai<sup>a,b,d</sup>, Khac-Minh Thai<sup>a,b,d</sup>, Huynh Nguyen Khanh Tran<sup>a,b,d,\*,#</sup>

<sup>a</sup> Faculty of Pharmacy, University of Health Sciences, Ho Chi Minh City, Vietnam.

Email: [thnkhanh@uhsvnu.edu.vn](mailto:thnkhanh@uhsvnu.edu.vn); Tel: +84939775593

<sup>b</sup> Research Center for Discovery and Development of Healthcare Products Vietnam National University Ho Chi Minh City, Ho Chi Minh City, Vietnam

<sup>c</sup> Faculty of Chemistry, University of Science, Ho Chi Minh City 70000, Vietnam

<sup>d</sup> Vietnam National University, Ho Chi Minh City 70000, Vietnam

<sup>e</sup> Faculty of Traditional Medicine, University of Medicine and Pharmacy at Ho Chi Minh City, Vietnam

<sup>f</sup> College of Natural Sciences, Can Tho University, 3/2 Street, Can Tho 900000, Vietnam

<sup>g</sup> FPT University, Greenwich Vietnam, Hochiminh Campus, Ho Chi Minh City, Vietnam

\*Corresponding author

E-mail: [thnkhanh@uhsvnu.edu.vn](mailto:thnkhanh@uhsvnu.edu.vn) / [hmktran2404@gmail.com](mailto:hmktran2404@gmail.com)

## Abstract

*Ziziphus jujuba* Lamk. (Táo Ta) are widely used in order of in traditional Asian medicine as superfruits. An ethanol extract of *Z. jujuba* fruit exhibited remarkable inhibition against PTP1B and was isolated via bioassay-guided fractionation, resulting in the identification of fifteen active triterpenoids (**1–15**), including betulinic acid (**1**), corosolic acid (**2**), oleanolic acid (**3**), alphitolic acid (**4**), maslinic acid (**5**), 3-*O*-*cis*-*p*-coumaroyl alphitolic acid (**6**), 3-*O*-*trans*-*p*-coumaroyl alphitolic acid (**7**), 2-*O*-*trans*-*p*-coumaroyl alphitolic acid (**8**), 2-*O*-*cis*-*p*-coumaroyl alphitolic acid (**9**), ceanothic acid (**10**), zizyberanolic acid (**11**), *trans*-*p*-coumaroyl betulinic acid (**12**), betulonic acid (**13**), ursolic acid (**14**), and oleanonic acid (**15**). These chemical structures were identified using nuclear magnetic resonance spectroscopy (NMR) and compared to those reported in other papers. Among the compounds tested for their effect against PTP1B and  $\alpha$ -glucosidase, compounds **1–3** displayed the most potent inhibitory activity, with ranging from IC<sub>50</sub> values from 6.75 to 17.02  $\mu$ M. Besides, Compounds **4**, **10**, and **13** exhibited weak PTP1B inhibitory activity (IC<sub>50</sub> = 53.42 to 90.90  $\mu$ M), whereas **5–15** showed no inhibitory effect in all tested concentrations. Additionally, molecular docking and molecular dynamics simulations were performed to evaluate the binding affinity of compounds **1–3** toward PTP1B and  $\alpha$ -glucosidase, two key enzymes involved in glucose homeostasis. These interactions may contribute to the modulation of insulin signaling pathways and postprandial glucose levels, thereby improving glycemic control in diabetes. Moreover, *in silico* ADME and toxicity prediction further suggested that **1–3** possess favorable pharmacokinetic properties and lower predicted toxicity. These findings provide a rational basis for using *Ziziphus* sourced from Vietnam to develop potential PTP1B and  $\alpha$ -glucosidase dual inhibitors, warranting further investigations, and are considered the first report on the chemical and bioactive investigation of this species.

**Keywords:** *Ziziphus jujuba* Lamk., pentacyclic triterpenoids, PTP1B inhibition,  $\alpha$ -glucosidase, molecular docking, molecular dynamics, ADME/toxicity prediction

## List of Figures

**Figure S1.**  $^1\text{H}$  NMR spectrum of compound **1** (500 MHz, pyridine- $d_5$ )

**Figure S2.**  $^{13}\text{C}$  NMR spectrum of compound **1** (500 MHz, pyridine- $d_5$ )

**Figure S3.**  $^1\text{H}$  NMR spectrum of compound **2** (500 MHz, pyridine- $d_5$ )

**Figure S4.**  $^{13}\text{C}$  NMR spectrum of compound **2** (500 MHz, pyridine- $d_5$ )

**Figure S5.**  $^1\text{H}$  NMR spectrum of compound **3** (500 MHz, chloroform- $d$ )

**Figure S6.**  $^{13}\text{C}$  NMR spectrum of compound **3** (500 MHz, chloroform- $d$ )

**Figure S7.**  $^1\text{H}$  NMR spectrum of compound **4** (500 MHz, pyridine- $d_5$ )

**Figure S8.**  $^{13}\text{C}$  NMR spectrum of compound **4** (500 MHz, pyridine- $d_5$ )

**Figure S9.**  $^1\text{H}$  NMR spectrum of compound **5** (400 MHz, methanol- $d_4$ )

**Figure S10.**  $^{13}\text{C}$  NMR spectrum of compound **5** (400 MHz, methanol- $d_4$ )

**Figure S11.**  $^1\text{H}$  NMR spectrum of compound **6** (400 MHz, chloroform- $d$ )

**Figure S12.**  $^{13}\text{C}$  NMR spectrum of compound **6** (100 MHz, chloroform- $d$ )

**Figure S13.**  $^1\text{H}$  NMR spectrum of compound **7** (400 MHz, methanol- $d_4$ )

**Figure S14.**  $^{13}\text{C}$  NMR spectrum of compound **7** (100 MHz, methanol- $d_4$ )

**Figure S15:**  $^1\text{H}$  NMR spectrum of compound **8** (400 MHz, pyridine- $d_5$ )

**Figure S16.**  $^{13}\text{C}$  NMR spectrum of compound **8** (100 MHz, pyridine- $d_5$ )

**Figure S17.**  $^1\text{H}$  NMR spectrum of compound **9** (400 MHz, chloroform- $d$ )

**Figure S18.**  $^{13}\text{C}$  NMR spectrum of compound **9** (100 MHz, chloroform- $d$ )

**Figure S19.**  $^1\text{H}$  NMR spectrum of compound **10** (400 MHz, chloroform- $d$ + methanol- $d_4$  10:1)

**Figure S20.**  $^{13}\text{C}$  NMR spectrum of compound **10** (400 MHz, chloroform- $d$ + methanol- $d_4$  10:1)

**Figure S21.**  $^1\text{H}$  NMR spectrum of compound **11** (400 MHz, pyridine- $d_5$ )

**Figure S22.**  $^{13}\text{C}$  NMR spectrum of compound **11** (100 MHz, pyridine- $d_5$ )

**Figure S23.**  $^1\text{H}$  NMR spectrum of compound **12** (500 MHz, chloroform- $d$ )

**Figure S24.**  $^1\text{H}$  NMR spectrum of compound **13** (400 MHz, chloroform-*d*)

**Figure S25.**  $^{13}\text{C}$  NMR spectrum of compound **13** (100 MHz, chloroform-*d*)

**Figure S26.**  $^1\text{H}$  NMR spectrum of compound **14** (500 MHz, pyridine-*d*<sub>5</sub>)

**Figure S27.**  $^{13}\text{C}$  NMR spectrum of compound **14** (500 MHz, pyridine-*d*<sub>5</sub>)

**Figure S28.**  $^1\text{H}$  NMR spectrum of compound **15** (400 MHz, chloroform-*d*)

**Figure S29.**  $^{13}\text{C}$  NMR spectrum of compound **15** (100 MHz, chloroform-*d*)

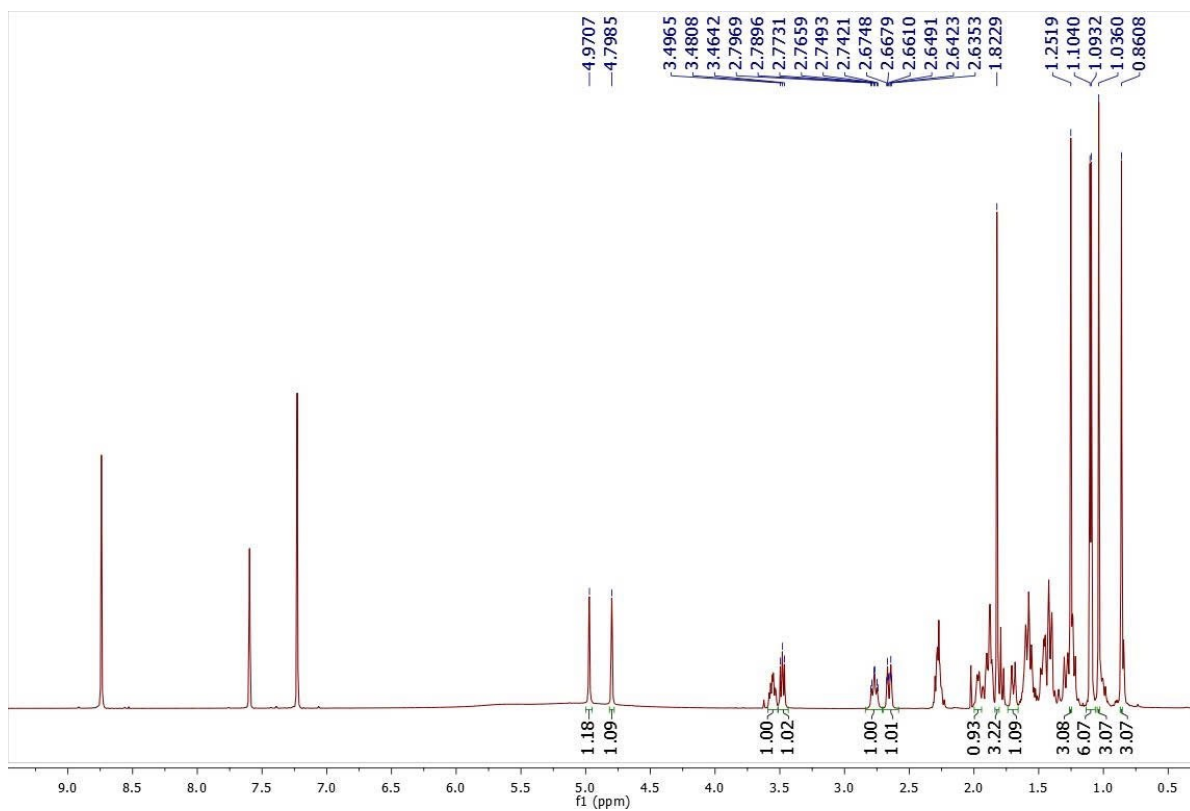

**Figure S1.**  $^1\text{H}$  NMR spectrum of compound **1** (500 MHz, pyridine- $d_5$ )

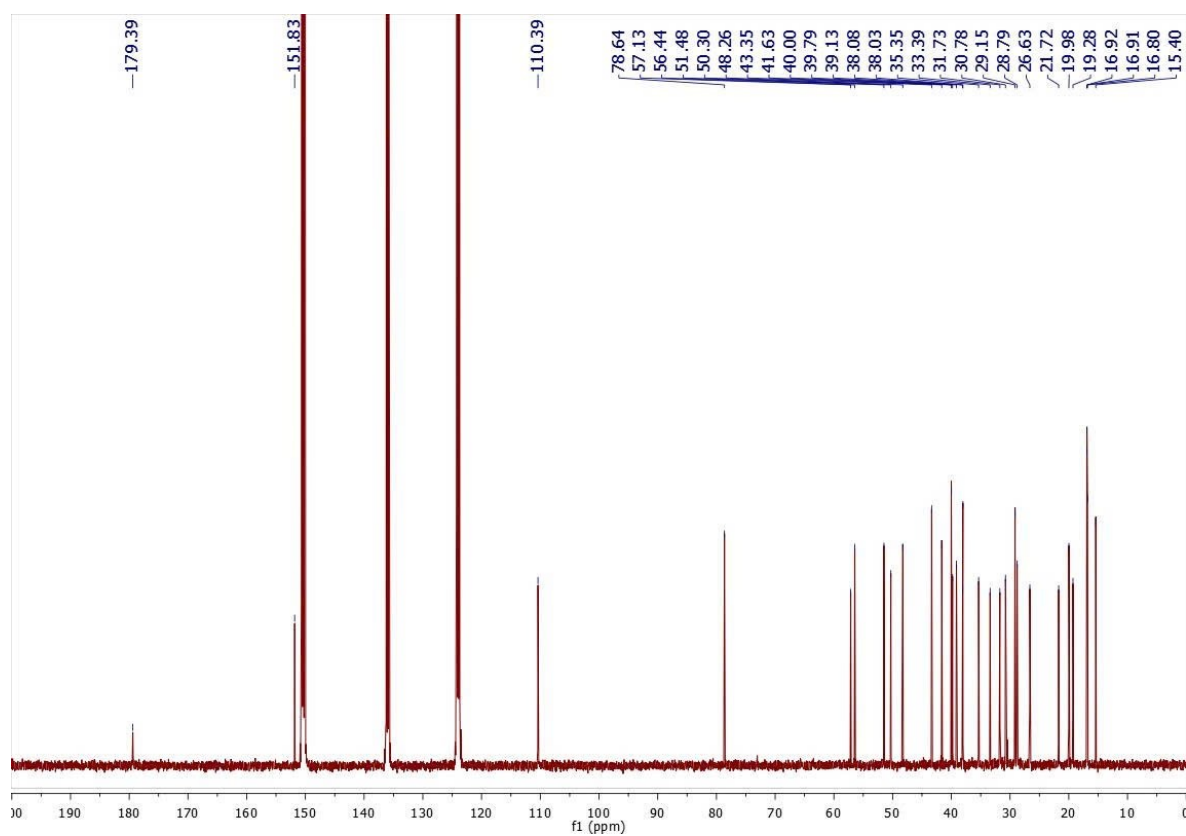

**Figure S2.**  $^{13}\text{C}$  NMR spectrum of compound **1** (500 MHz, pyridine- $d_5$ )

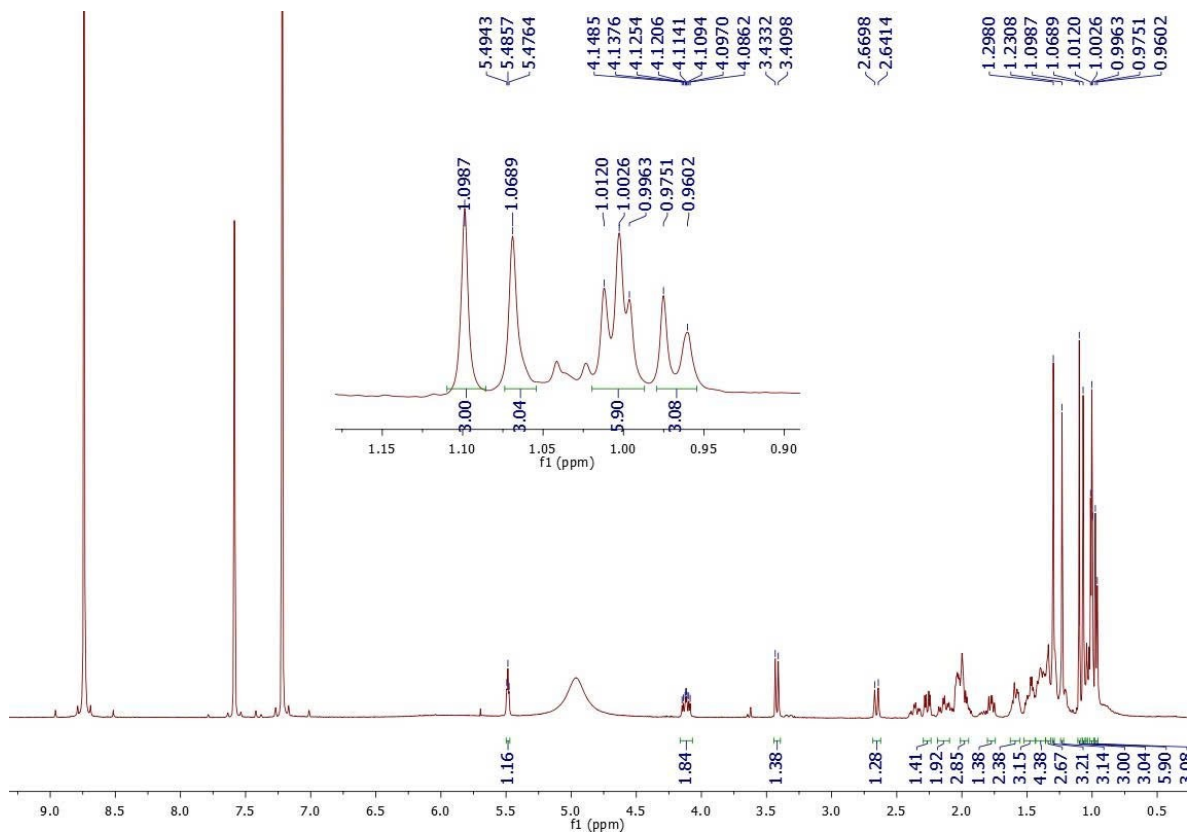

**Figure S3:** <sup>1</sup>H NMR spectrum of compound **2** (500 MHz, pyridine-*d*<sub>5</sub>)

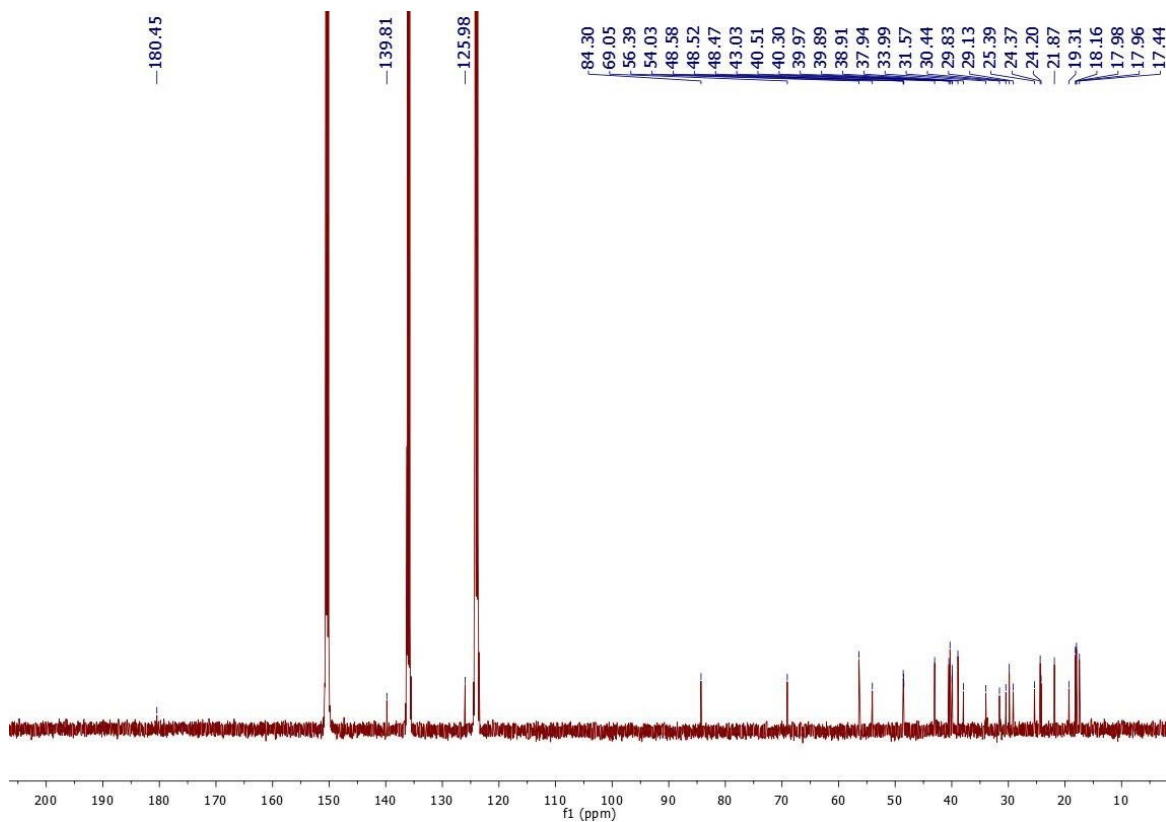

**Figure S4.** <sup>13</sup>C NMR spectrum of compound **2** (500 MHz, pyridine-*d*<sub>5</sub>)

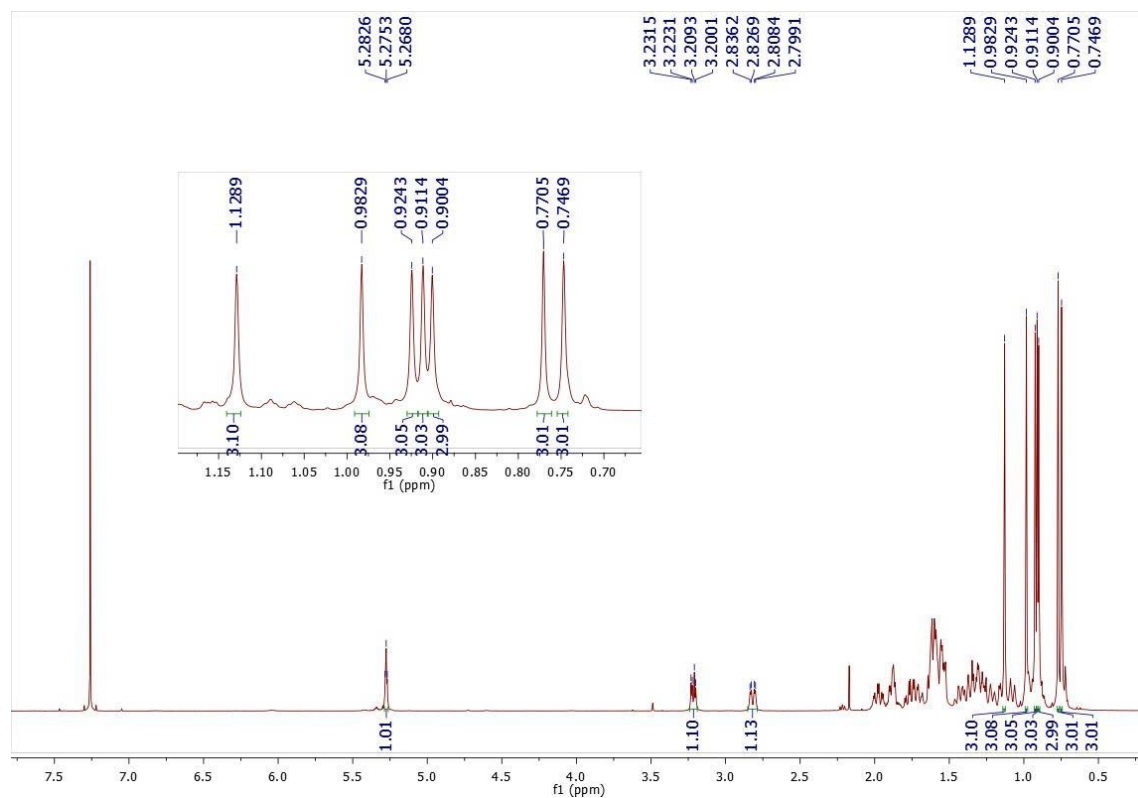

**Figure S5:**  $^1\text{H}$  NMR spectrum of compound **3** (500 MHz, chloroform-*d*)

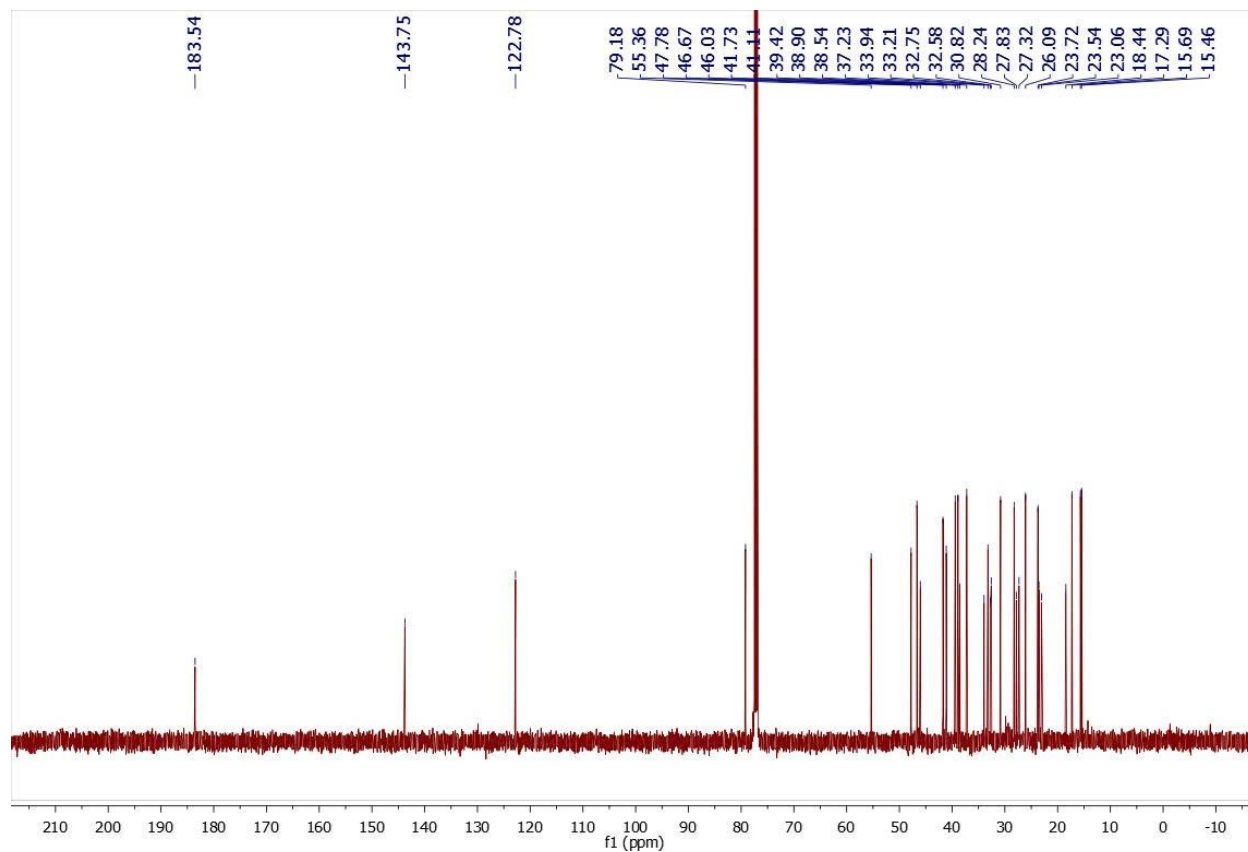

**Figure S6.**  $^{13}\text{C}$  NMR spectrum of compound **3** (500 MHz, chloroform-*d*)

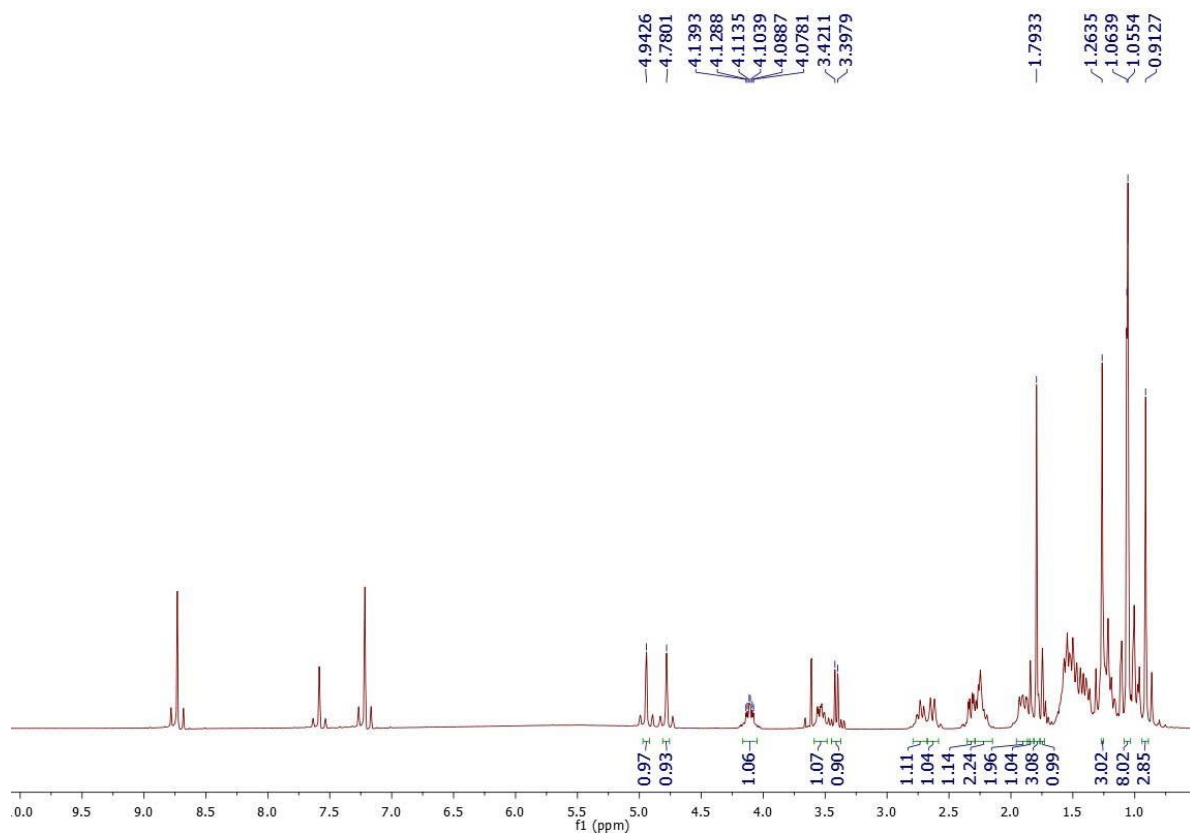

**Figure S7:**  $^1\text{H}$  NMR spectrum of compound **4** (500 MHz, pyridine- $d_5$ )

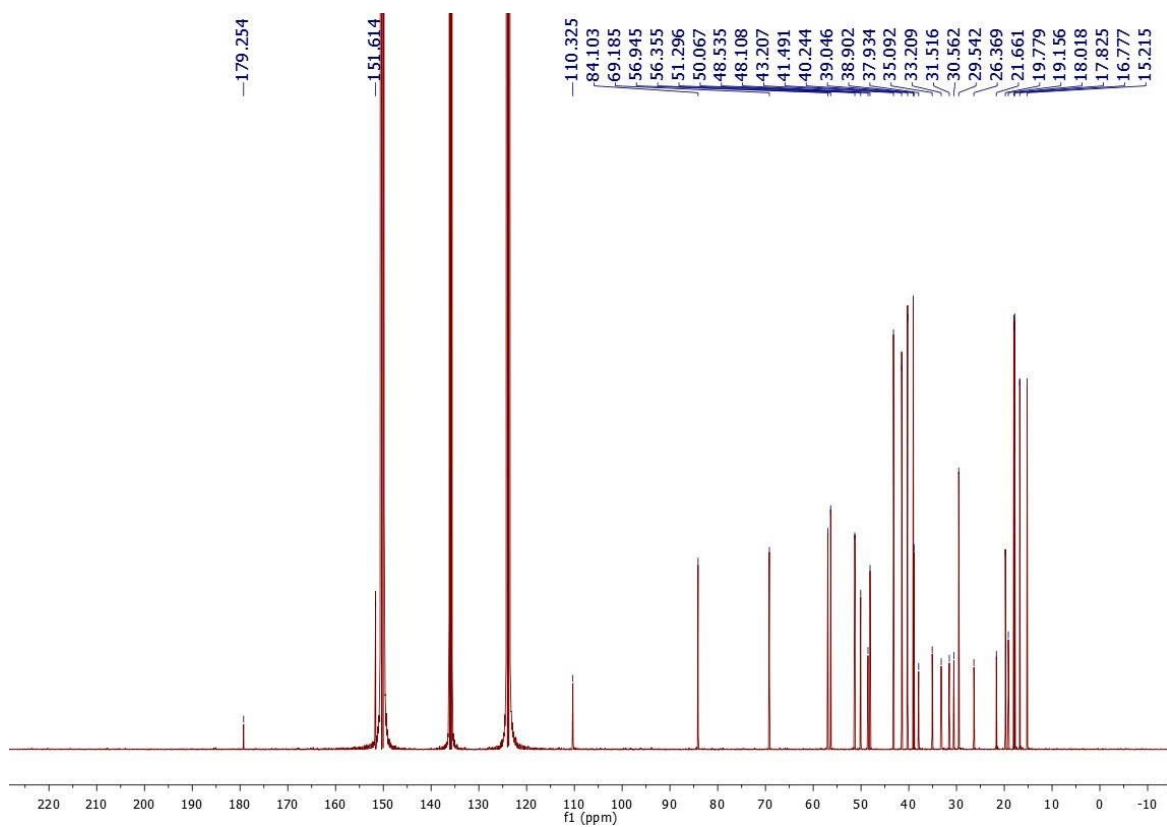

**Figure S8.**  $^{13}\text{C}$  NMR spectrum of compound **4** (500 MHz, pyridine- $d_5$ )

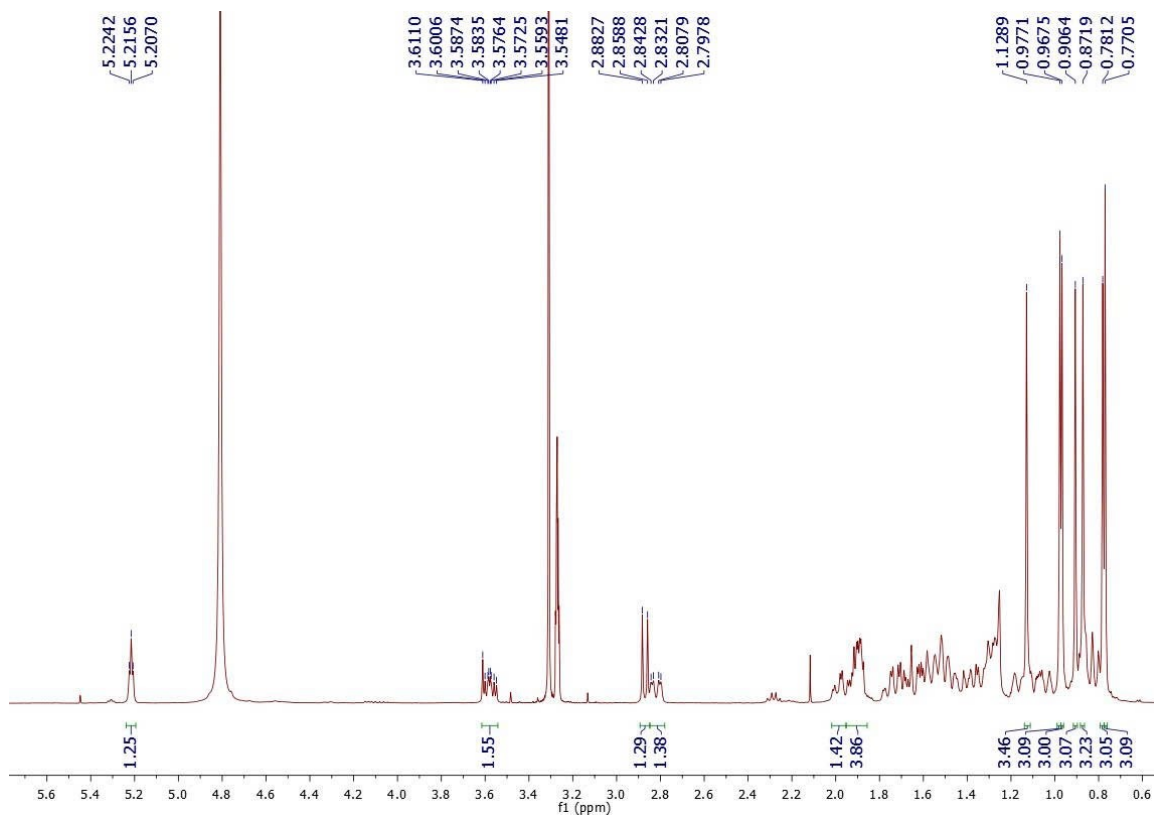

**Figure S9:**  $^1\text{H}$  NMR spectrum of compound **5** (400 MHz, methanol- $d_4$ )

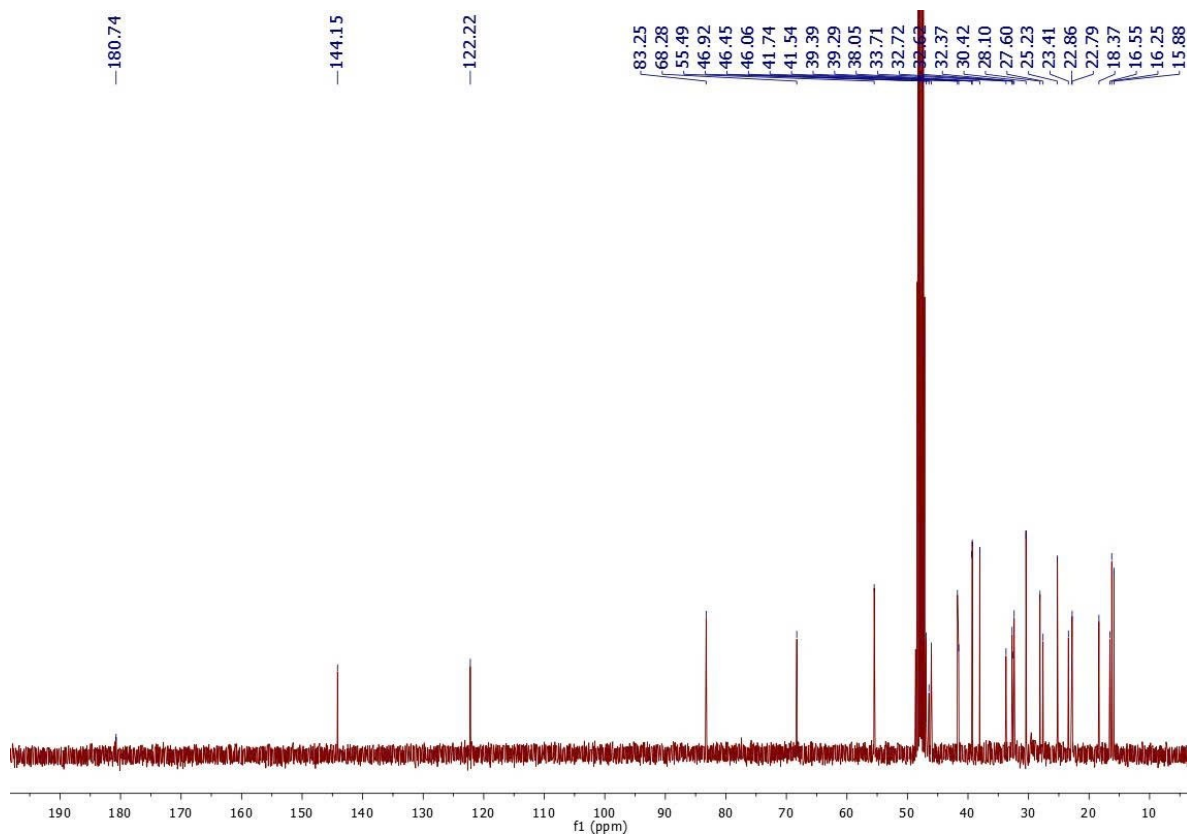

**Figure S10.**  $^{13}\text{C}$  NMR spectrum of compound **5** (400 MHz, methanol- $d_4$ )

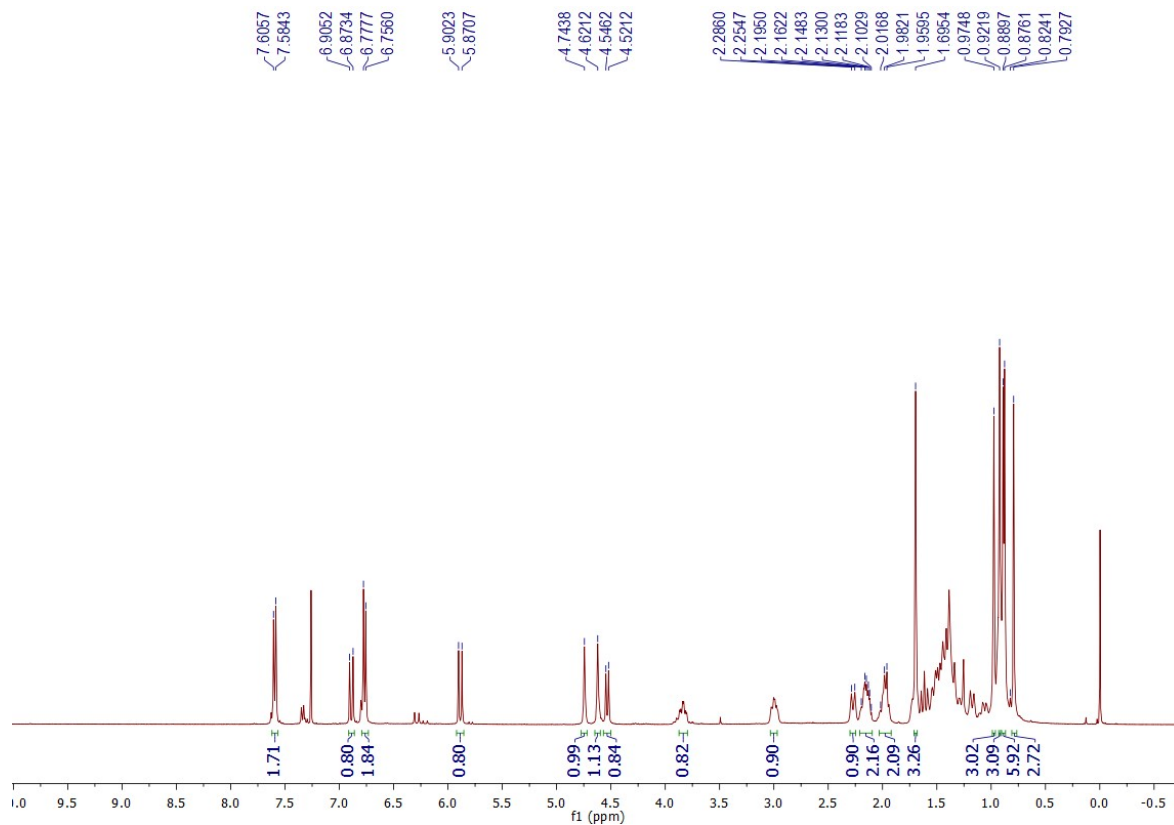

**Figure S11:**  $^1\text{H}$  NMR spectrum of compound **6** (400 MHz, chloroform-*d*)

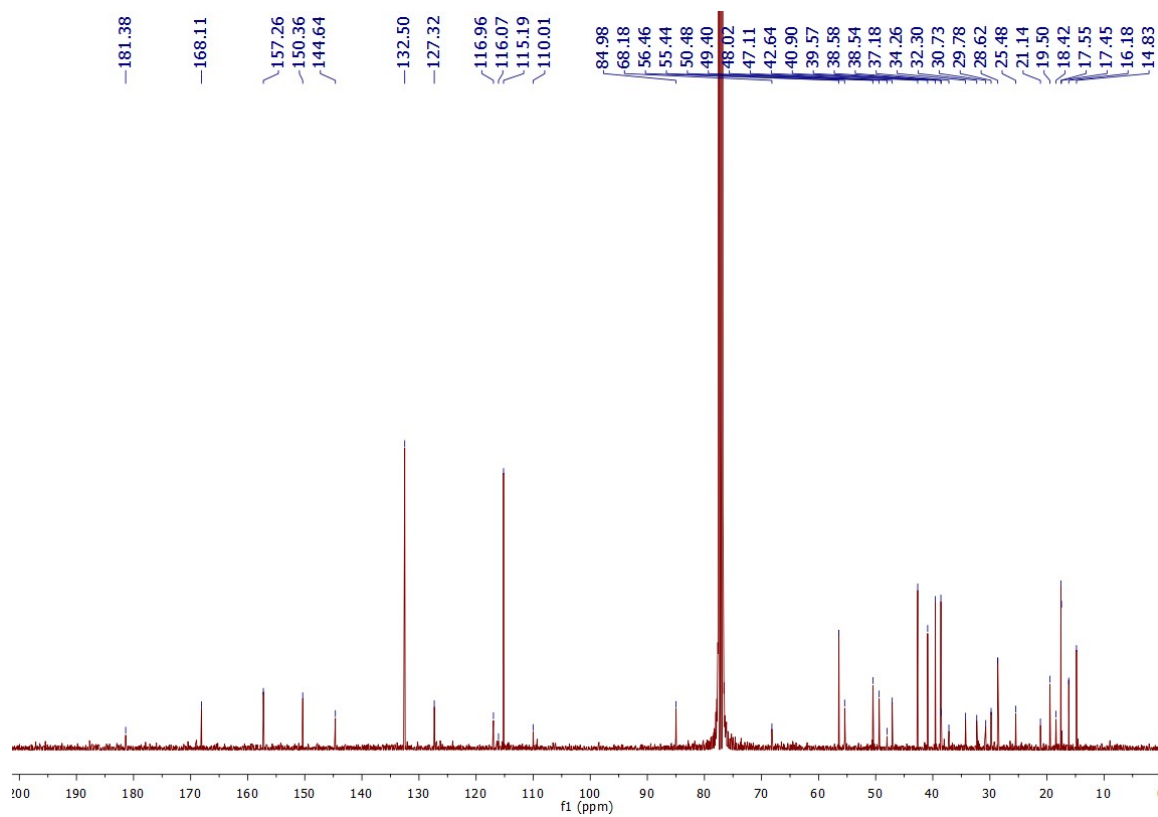

**Figure S12.**  $^{13}\text{C}$  NMR spectrum of compound **6** (100 MHz, chloroform-*d*)

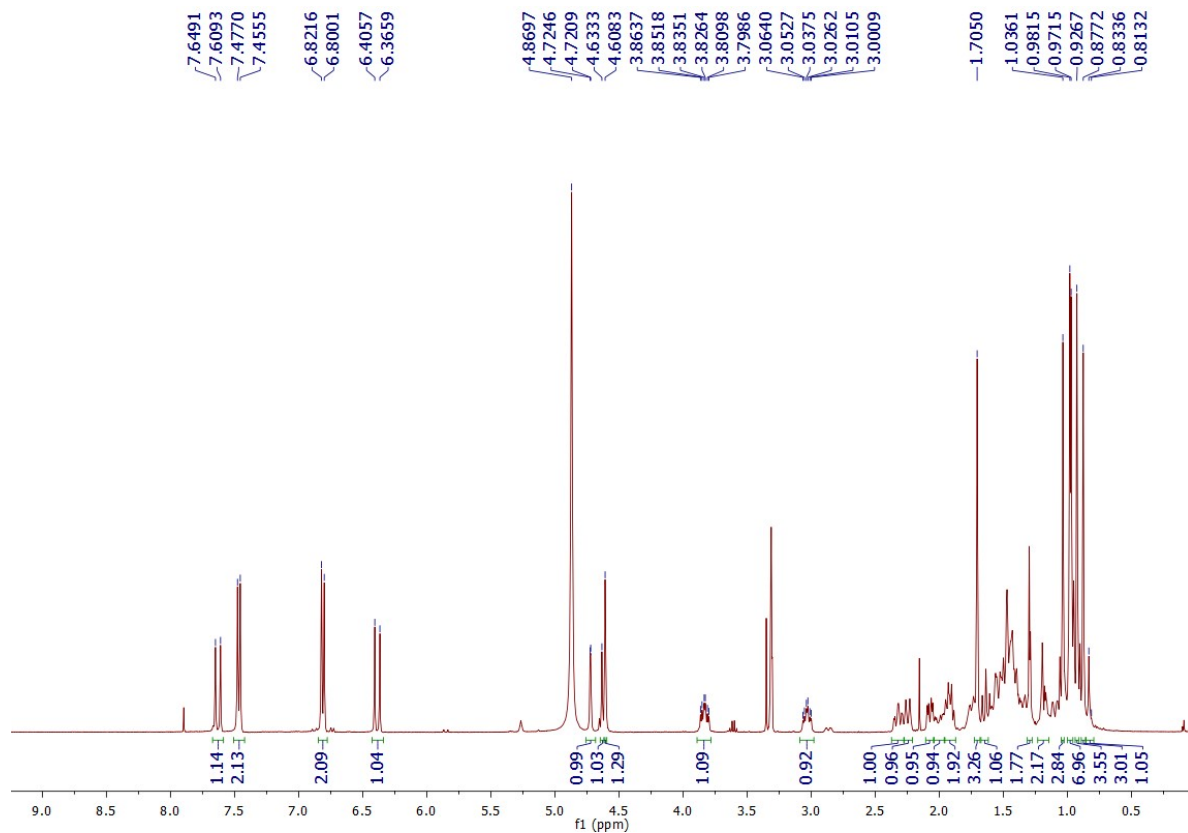

**Figure S13:**  $^1\text{H}$  NMR spectrum of compound **7** (400 MHz, methanol- $d_4$ )

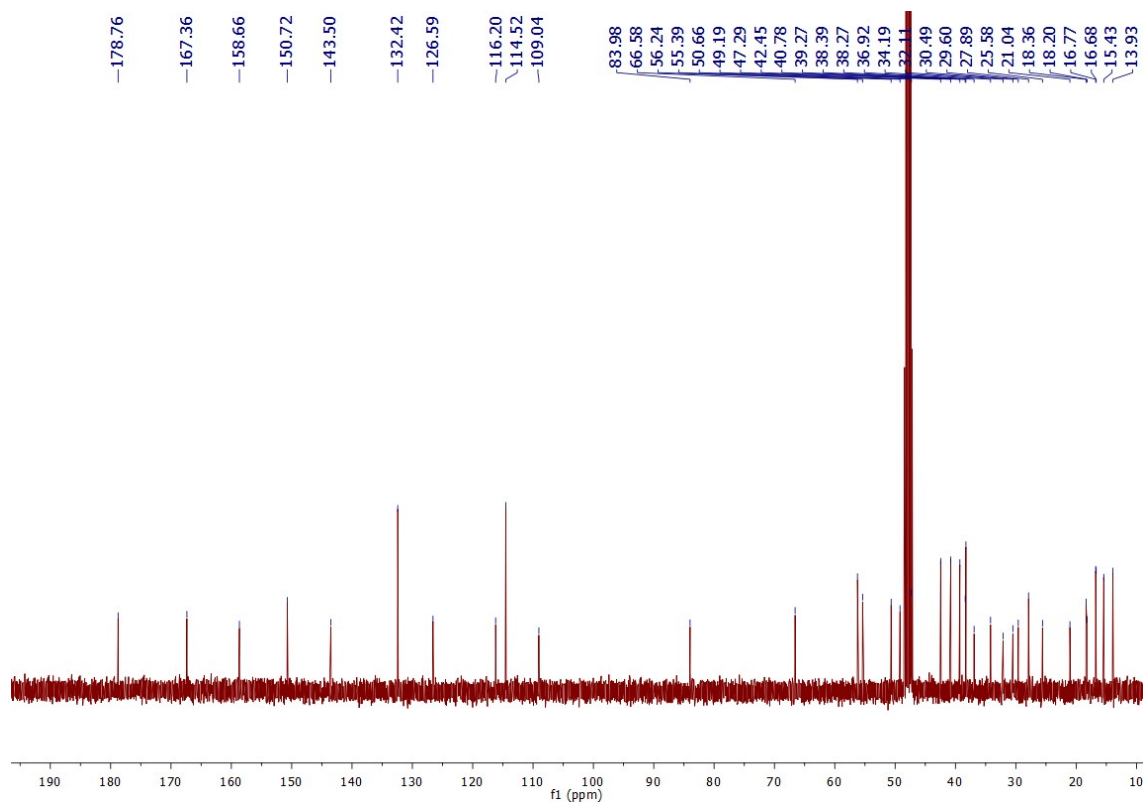

**Figure S14.**  $^{13}\text{C}$  NMR spectrum of compound **7** (100 MHz, methanol- $d_4$ )

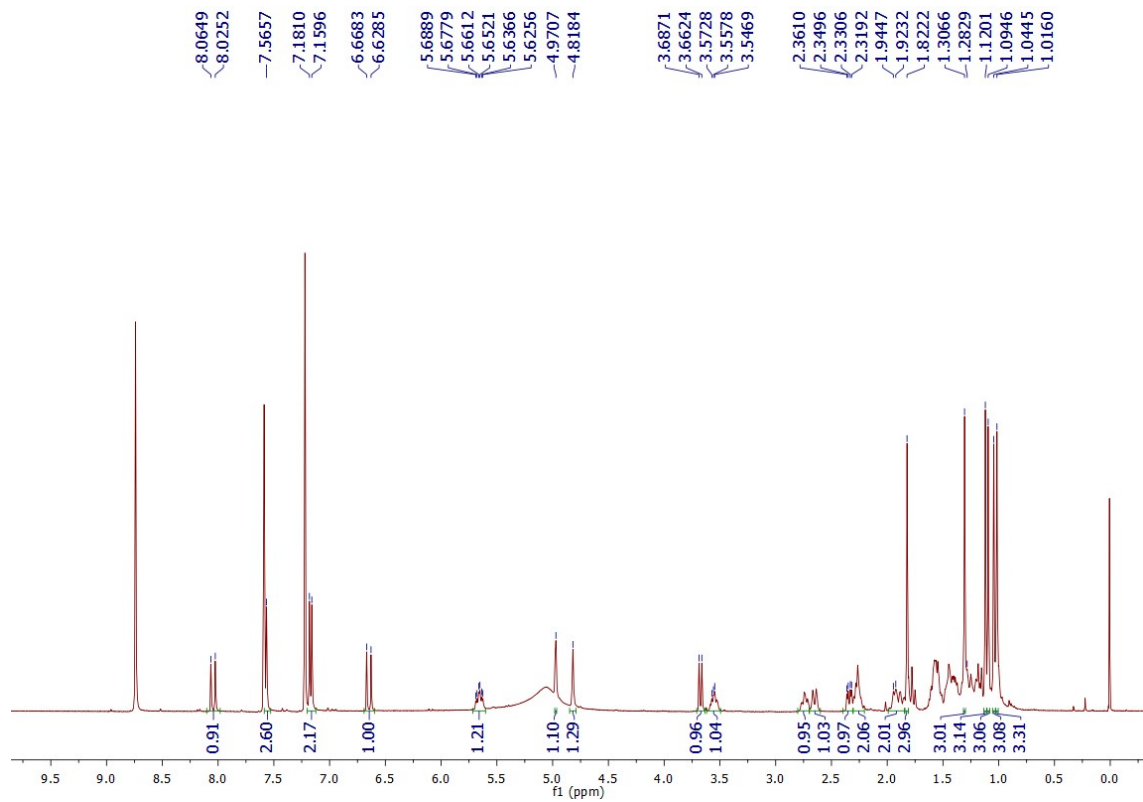

**Figure S15:**  $^1\text{H}$  NMR spectrum of compound **8** (400 MHz, pyridine- $d_5$ )

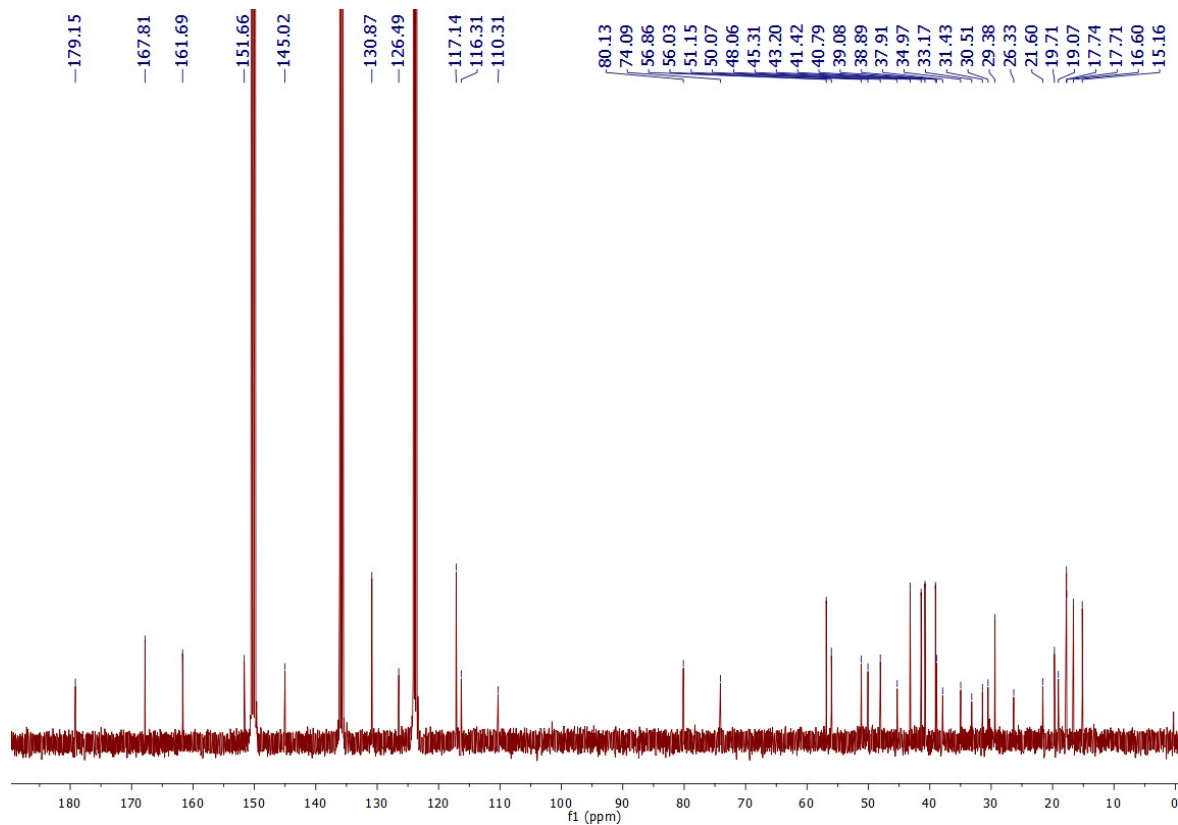

**Figure S16.**  $^{13}\text{C}$  NMR spectrum of compound **8** (100 MHz, pyridine- $d_5$ )

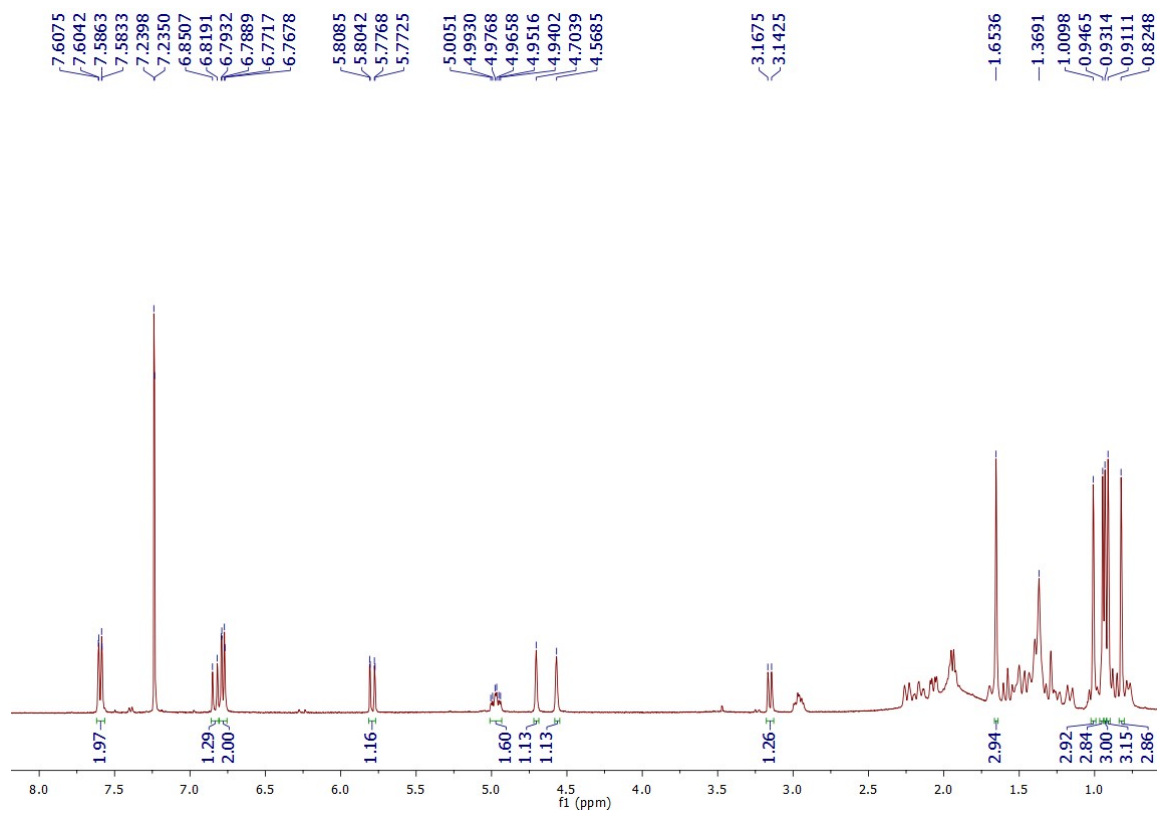

Figure S17:  $^1\text{H}$  NMR spectrum of compound **9** (400 MHz, chloroform-*d*)

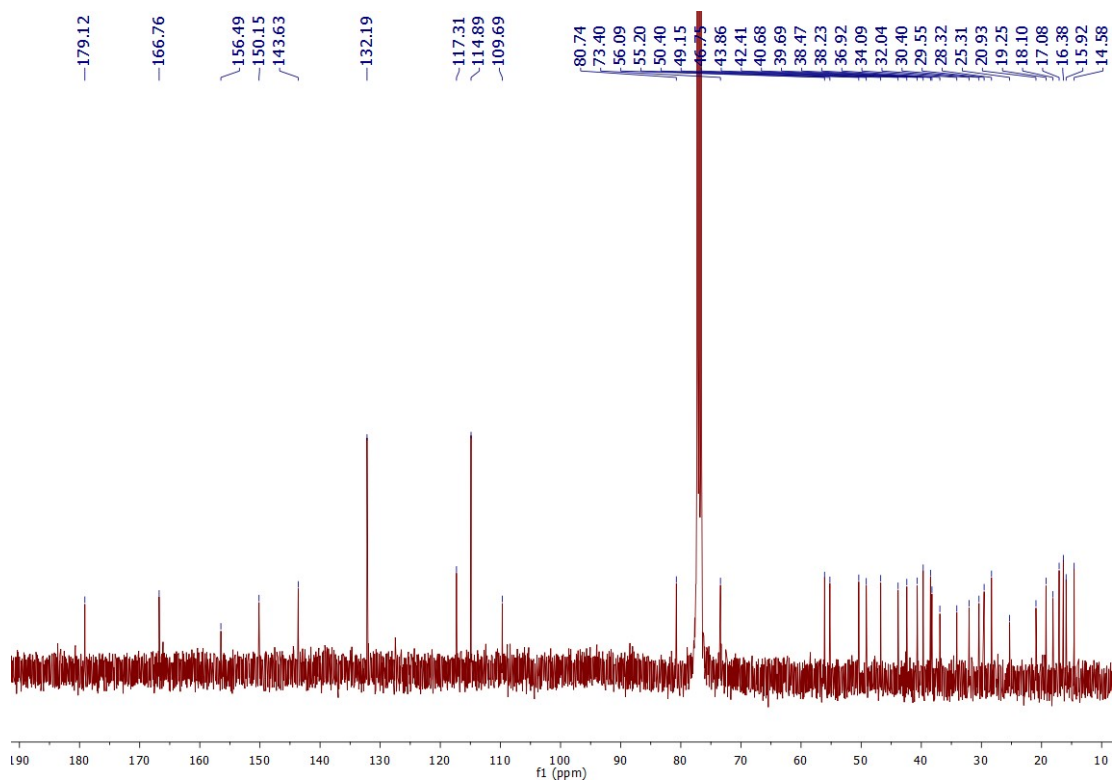

Figure S18:  $^{13}\text{C}$  NMR spectrum of compound **9** (100 MHz, chloroform-*d*)

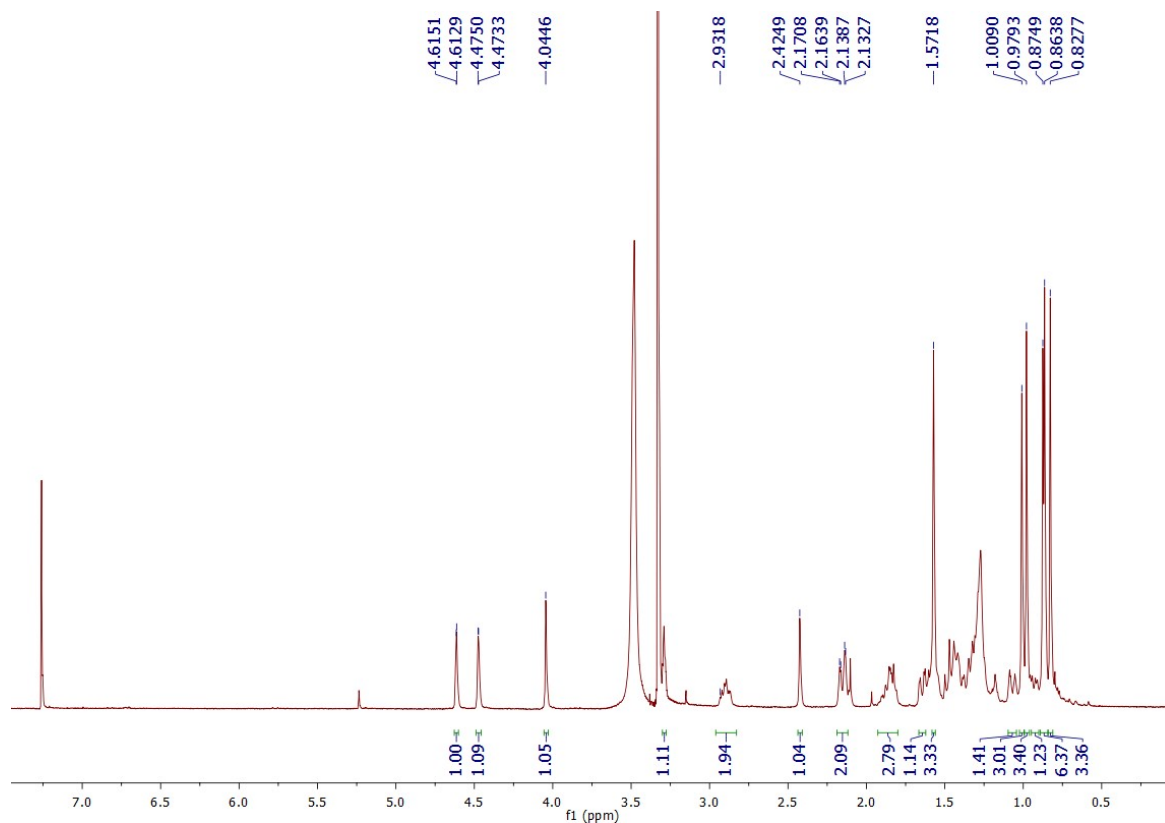

**Figure S19:**  $^1\text{H}$  NMR spectrum of compound **10** (400 MHz, chloroform- $d_3$ + methanol- $d_4$  10:1)

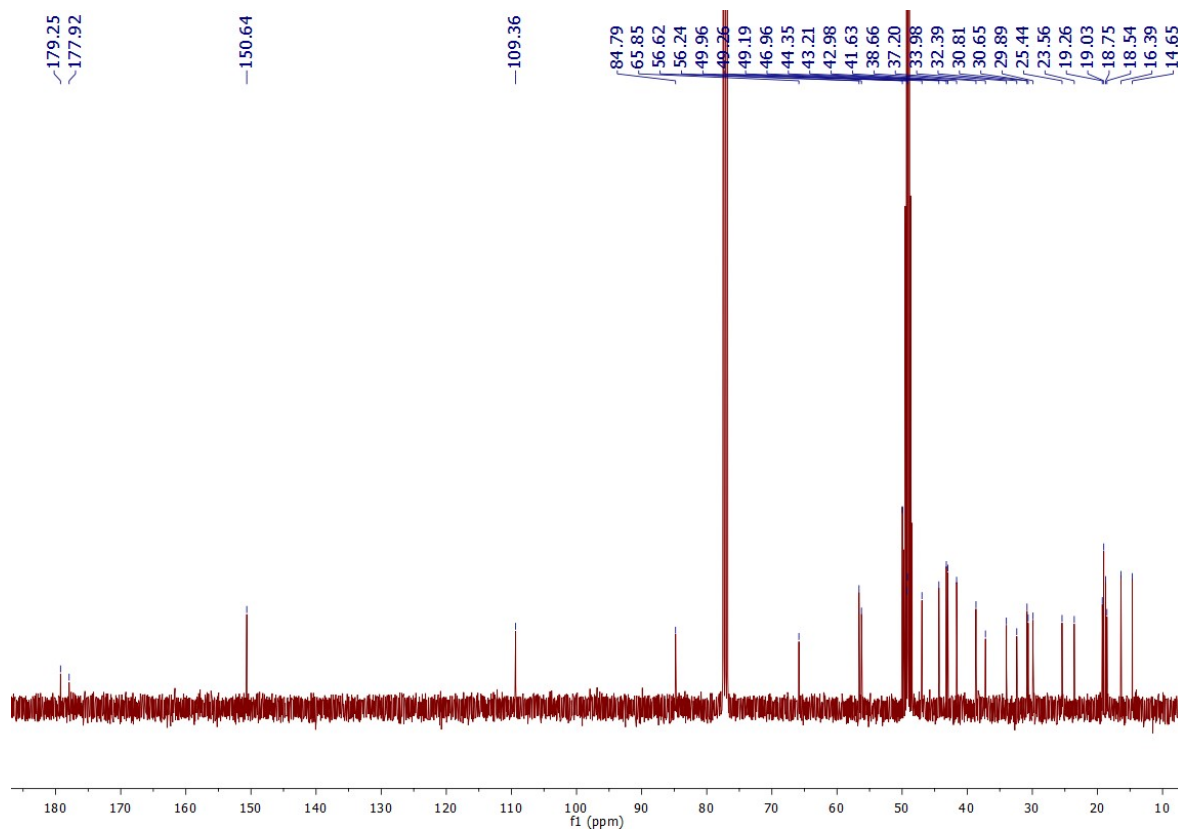

**Figure S20.**  $^{13}\text{C}$  NMR spectrum of compound **10** (400 MHz, chloroform- $d_3$ + methanol- $d_4$  10:1)

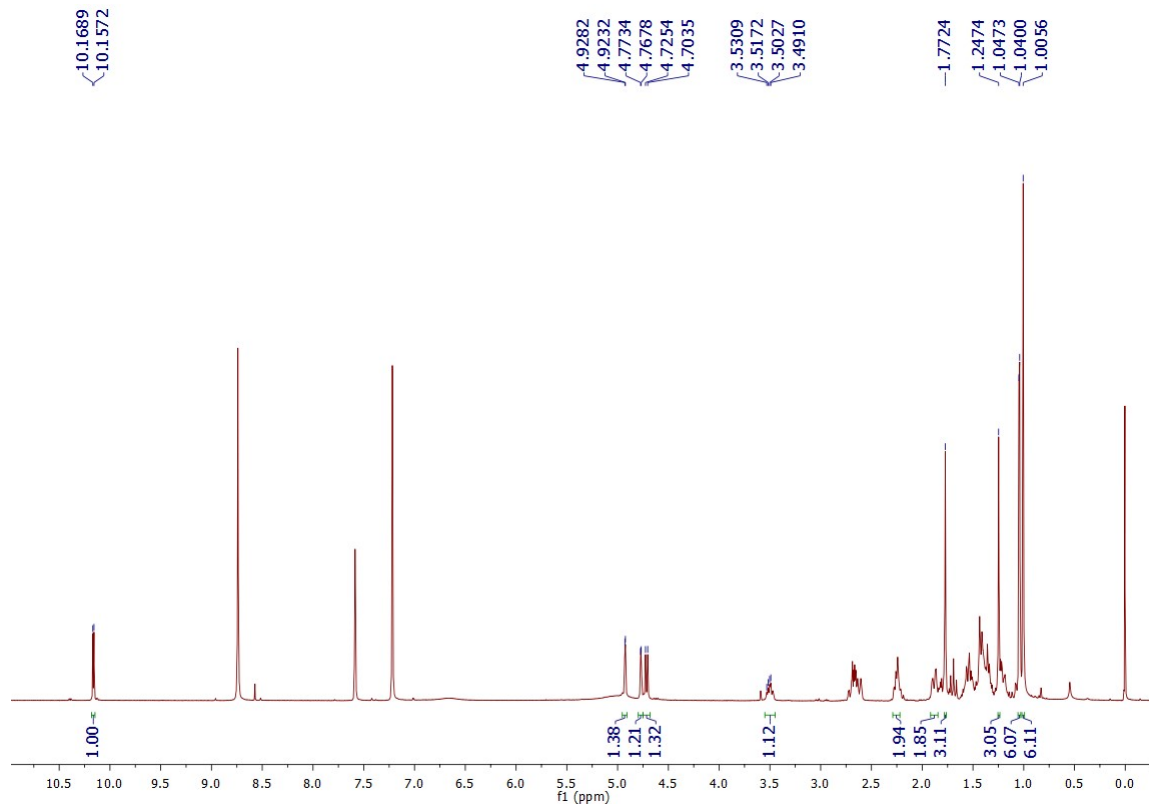

**Figure S21:**  $^1\text{H}$  NMR spectrum of compound **11** (400 MHz, pyridine- $d_5$ )

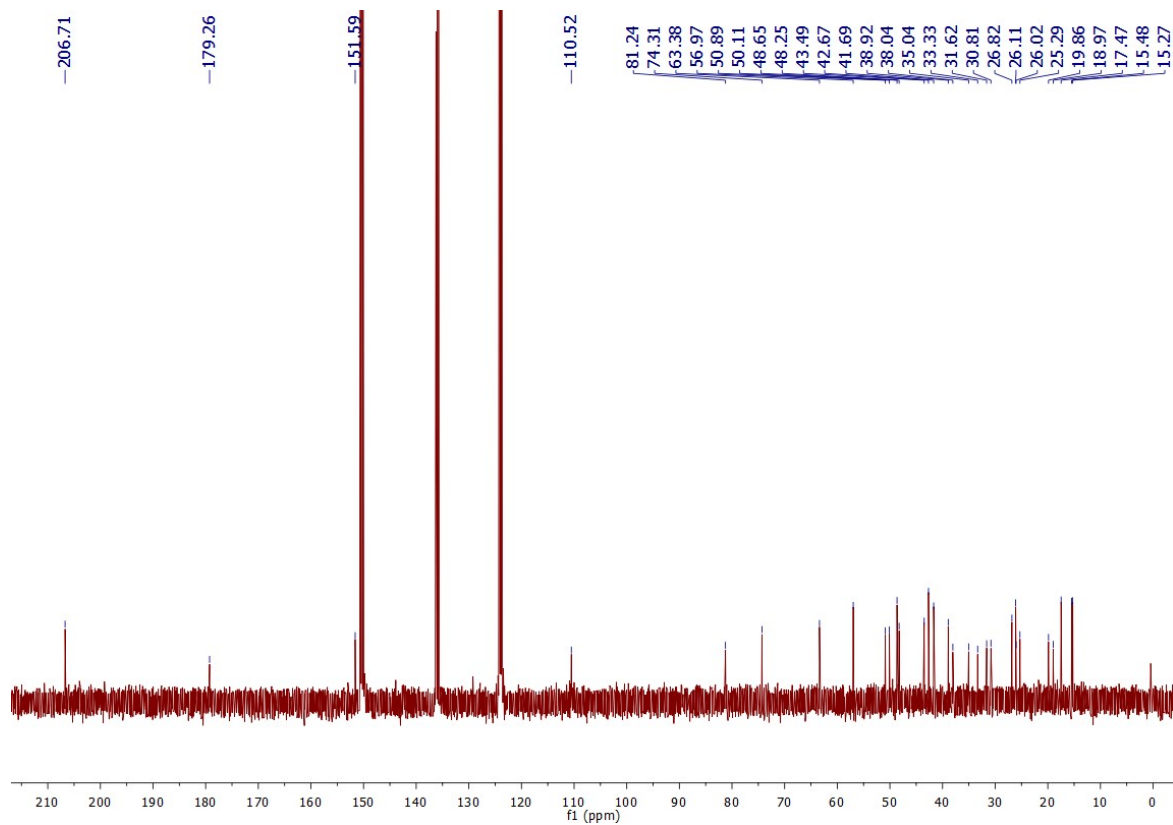

**Figure S22.**  $^{13}\text{C}$  NMR spectrum of compound **11** (100 MHz, pyridine- $d_5$ )

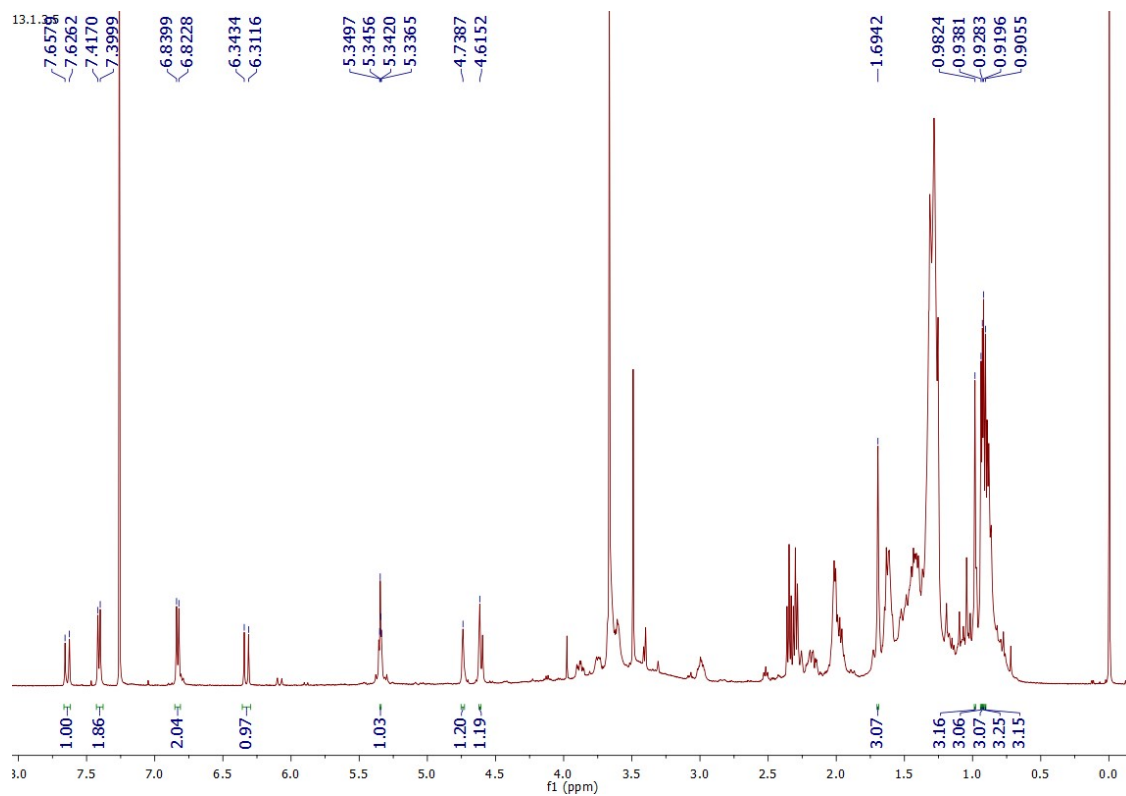

**Figure S23:**  $^1\text{H}$  NMR spectrum of compound **12** (500 MHz, chloroform-*d*)

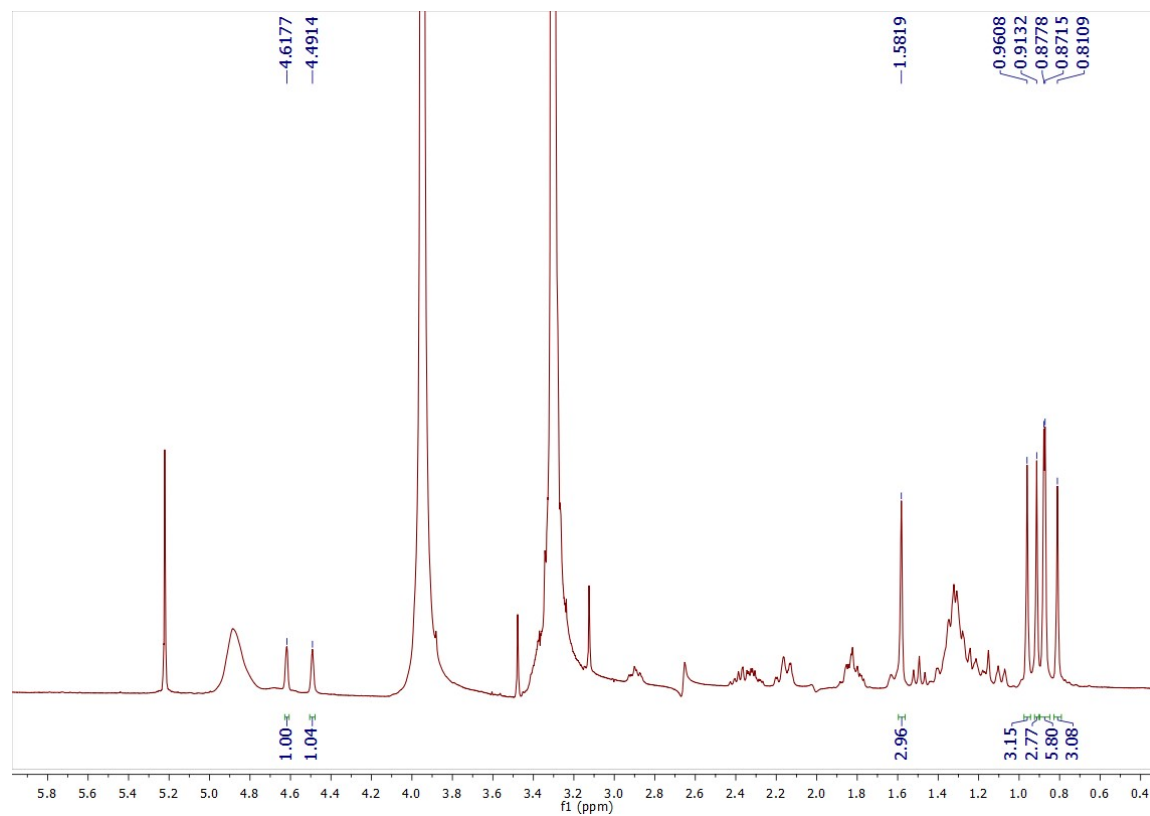

**Figure S24:**  $^1\text{H}$  NMR spectrum of compound **13** (400 MHz, chloroform-*d*)

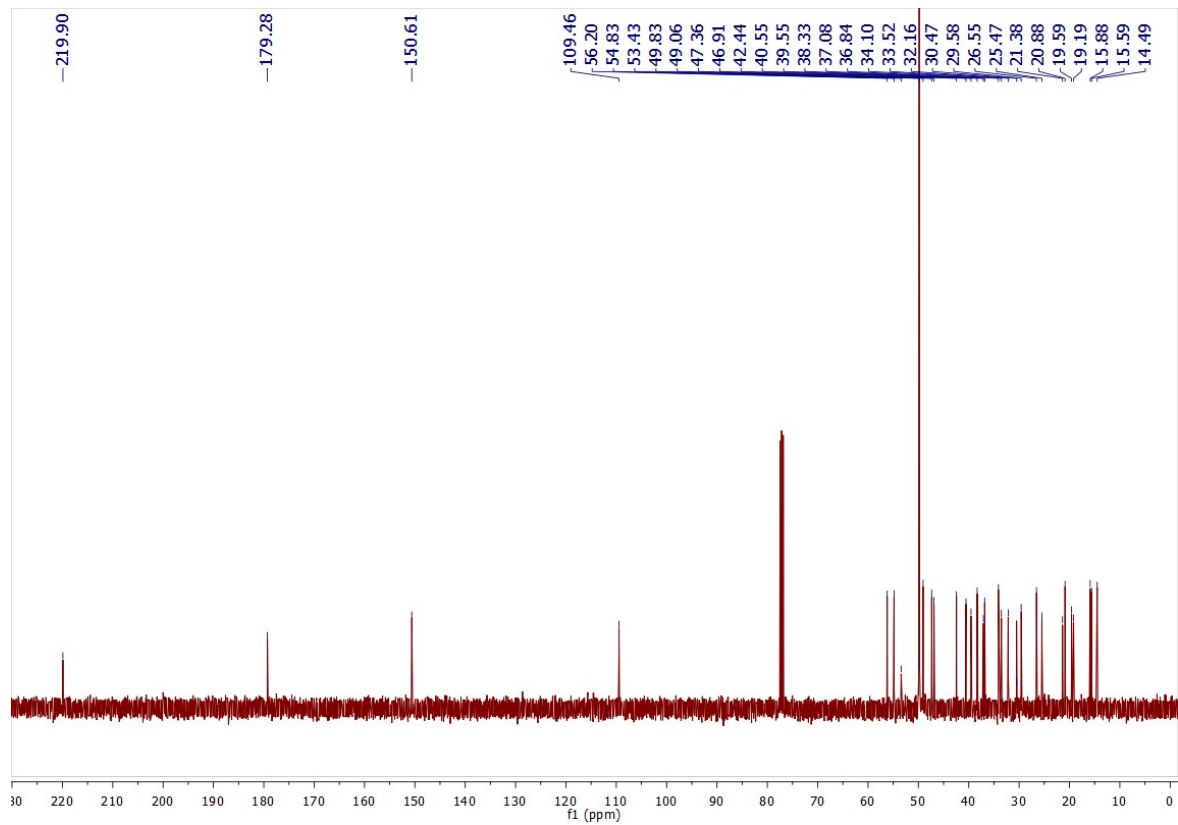

**Figure S25.**  $^{13}\text{C}$  NMR spectrum of compound **13** (100 MHz, chloroform- $d$ )

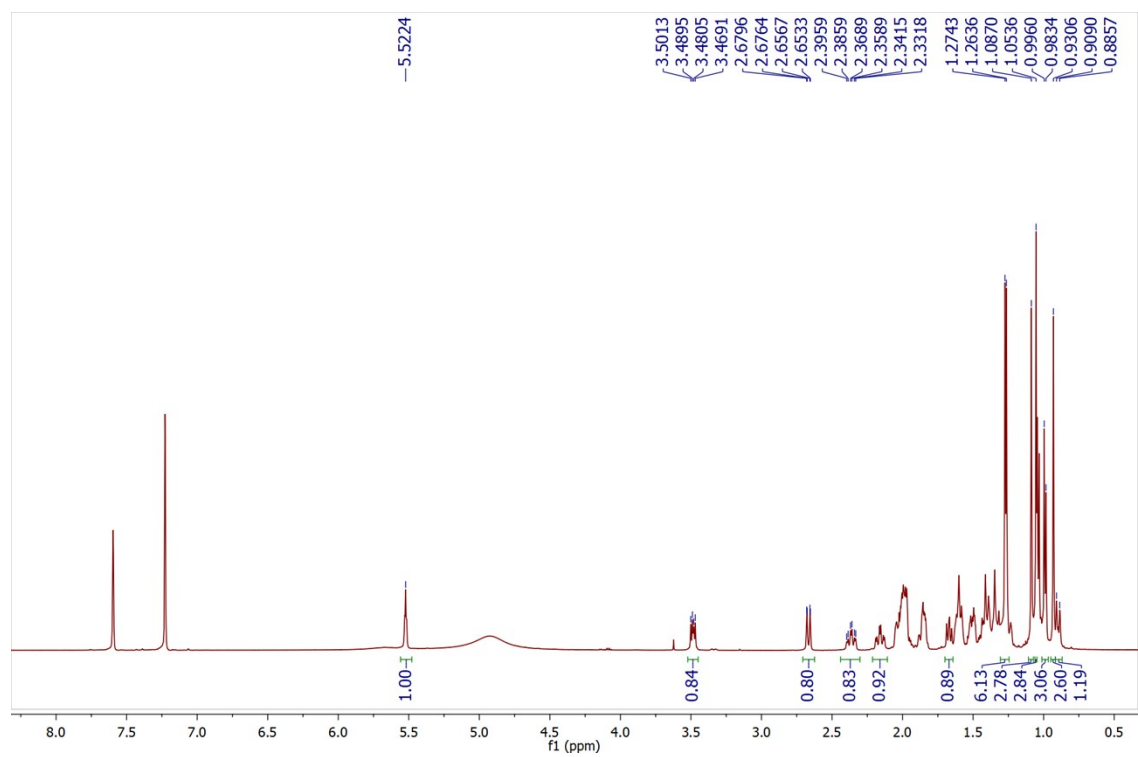

**Figure S26:**  $^1\text{H}$  NMR spectrum of compound **14** (500 MHz, pyridine- $d_5$ )

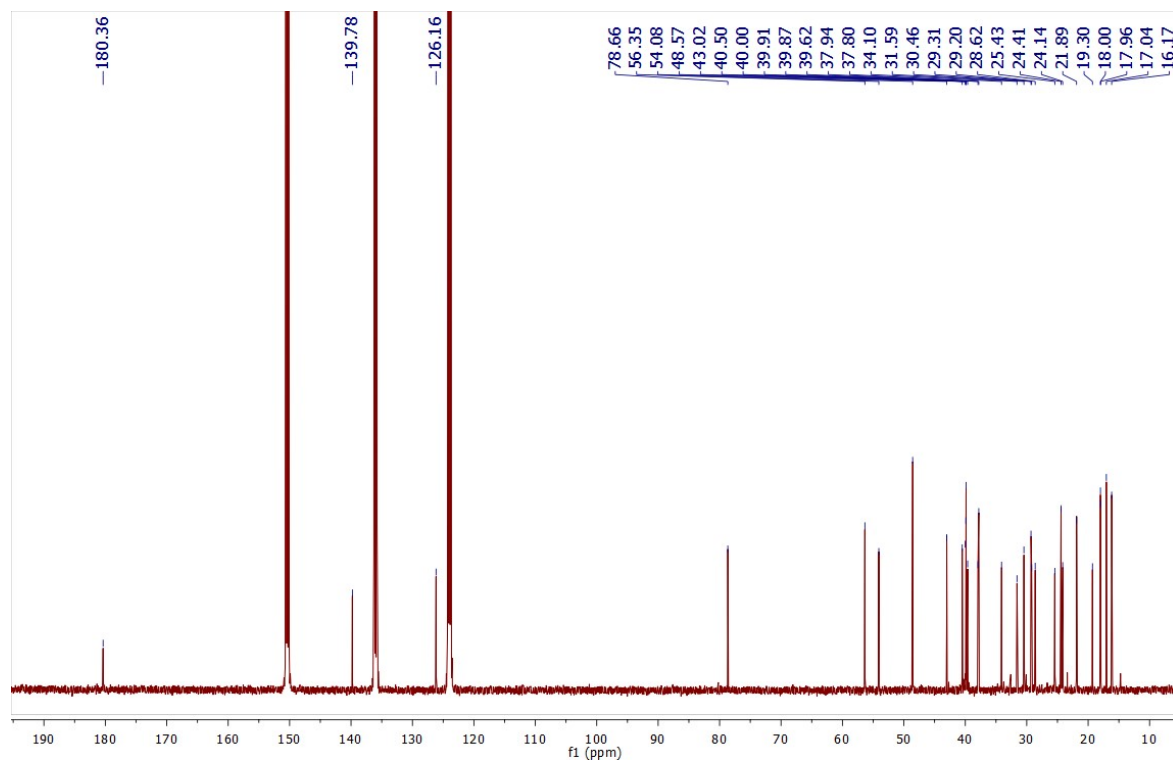

**Figure S27.**  $^{13}\text{C}$  NMR spectrum of compound **14** (500 MHz, pyridine- $d_5$ )

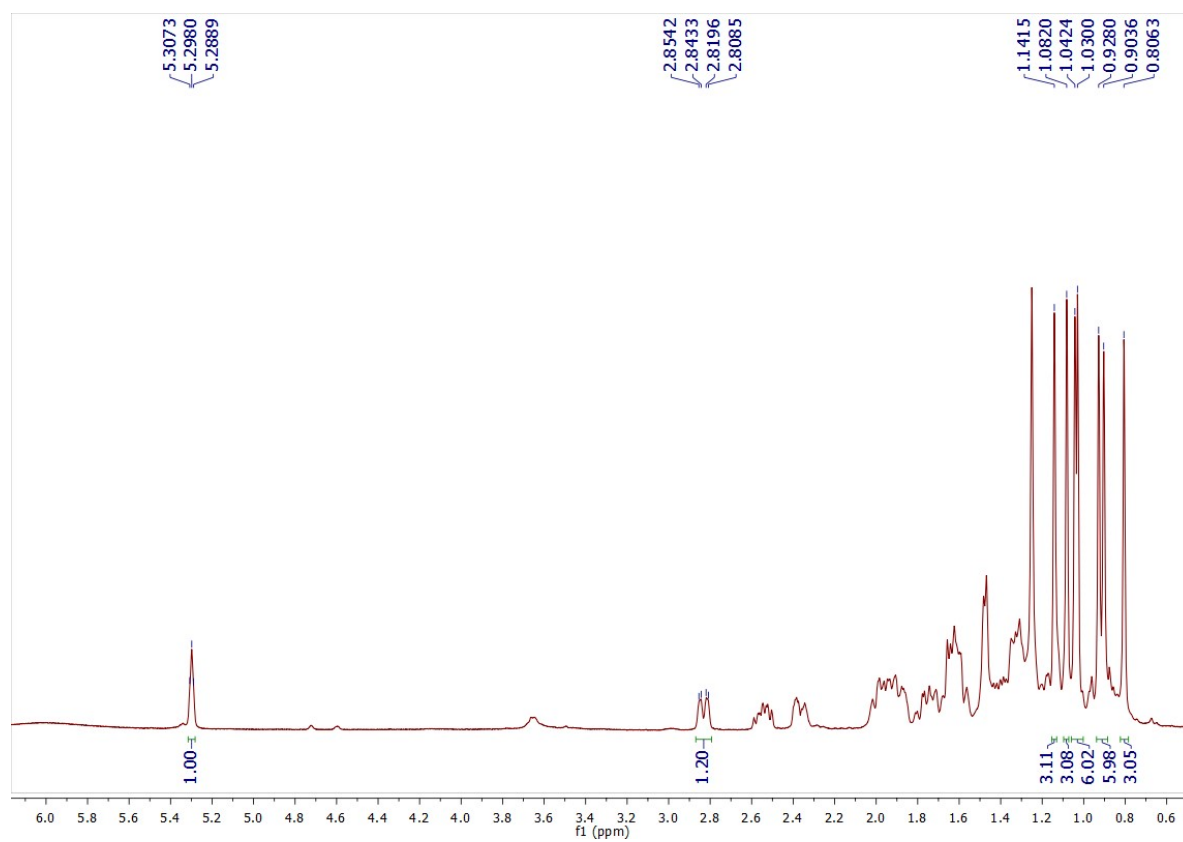

**Figure S28:**  $^1\text{H}$  NMR spectrum of compound **15** (400 MHz, chloroform- $d$ )

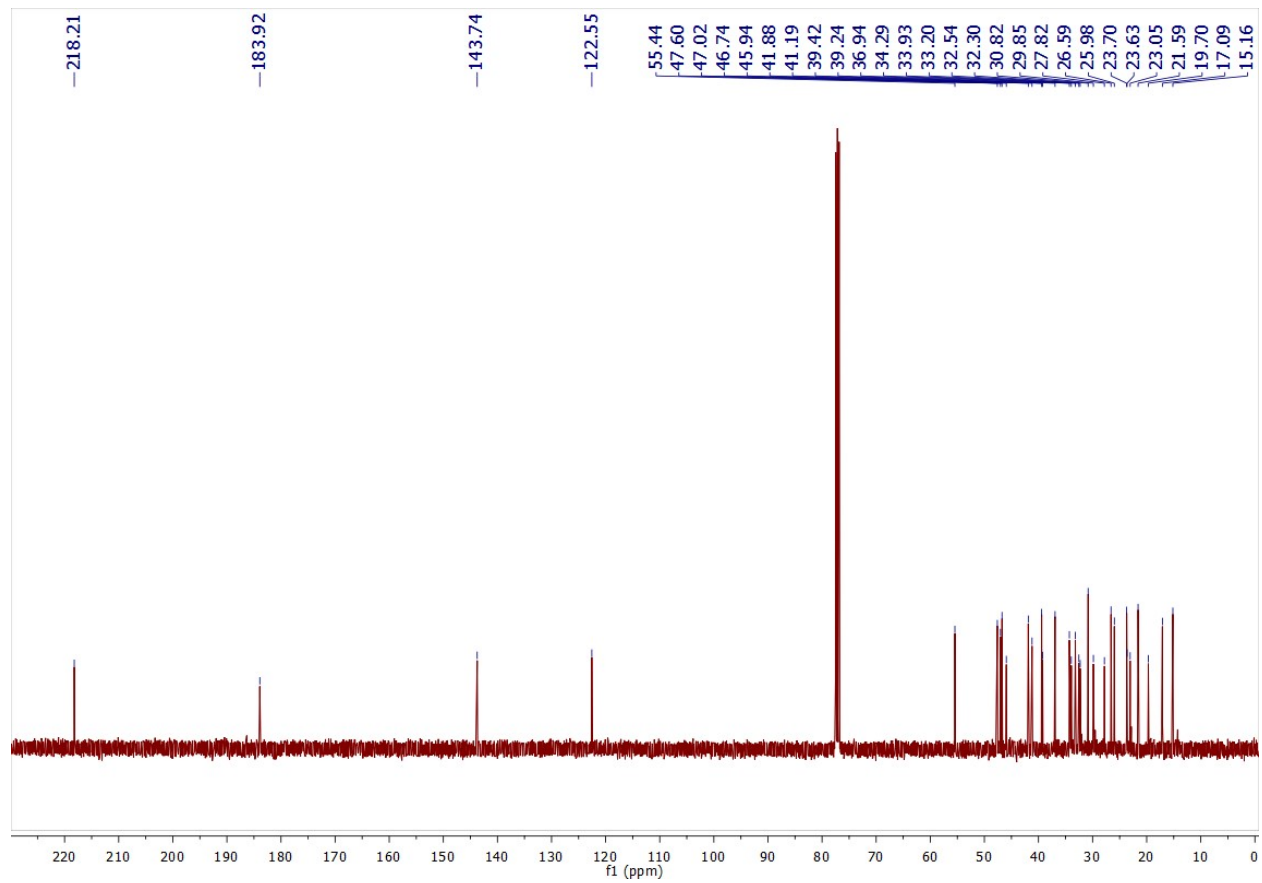

**Figure S29.**  $^{13}\text{C}$  NMR spectrum of compound **15** (100 MHz, chloroform-*d*)
